# Explicit control of step timing during split-belt walking reveals interdependent recalibration of movements in space and time

Marcela Gonzalez-Rubio<sup>1</sup>, Nicolas F. Velasquez<sup>1</sup>, and Gelsy Torres-Oviedo<sup>\*1</sup>

<sup>1</sup> *University of Pittsburgh, Department of Bioengineering, Pittsburgh, PA, USA*

Correspondence\*:  
Gelsy Torres-Oviedo  
gelsyto@pitt.edu

## 2 ABSTRACT

3 Split-belt treadmills that move the legs at different speeds are thought to update internal  
4 representations of the environment, such that this novel condition generates a new locomotor  
5 pattern with distinct spatio-temporal features to those of regular walking. It is unclear the degree  
6 to which such recalibration of movements in the spatial and temporal domains is interdependent.  
7 In this study, we explicitly altered the adaptation of limb motions in either space or time during  
8 split-belt walking to determine its impact on the other domain. Interestingly, we observed that  
9 motor adaptation in the spatial domain was susceptible to altering the temporal domain, whereas  
10 motor adaptation in the temporal domain was resilient to modifying the spatial domain. This  
11 nonreciprocal relation suggests a hierarchical organization such that the control of timing in  
12 locomotion has an effect on the control of limb position. This is of translational interest because  
13 clinical populations often have a greater deficit in one domain compared to the other. Our results  
14 suggest that explicit changes to temporal deficits cannot occur without modifying the spatial  
15 control of the limb.

16 **Keywords:** locomotion, motor learning, split-belt, spatio-temporal, sensorimotor adaptation, kinematics

## 1 INTRODUCTION

17 We are constantly adapting our movements to demands imposed by changes in the environment or our  
18 body. In walking, this requires the adaptation of spatial and temporal gait features to control "where" and  
19 "when" we step, respectively. Particularly, in split-belt walking when one leg moves faster than the other, it  
20 has been observed that subjects minimize spatial and temporal asymmetries by adopting motor patterns  
21 specific to the split environment (Malone et al., 2012; Iturralde and Torres-Oviedo, 2019). It is thought  
22 that this is achieved by updating internal representations of the treadmill for the control of the limb in  
23 space and time (Malone et al., 2012). There is a clinical interest in understanding the interdependence in the  
24 control of these two aspects of movement because pathological gait often has a greater deficiency in one  
25 domain compared to the other (Finley et al., 2015; Malone and Bastian, 2014). Thus, there is a translational  
26 interest to determine if spatial and temporal asymmetries in clinical populations can be targeted and treated  
27 independently.

28 Ample evidence supports that the adaptation, and hence control, of spatial and temporal gait features  
29 is dissociable. Notably, studies have shown that inter-limb measures such as step timing (temporal) and  
30 step position (spatial) adapt at different rates (Sombric et al., 2017; Malone and Bastian, 2010), they  
31 exhibit different generalization patterns (Torres-Oviedo and Bastian, 2010), and follow distinct adaptation

32 dynamics throughout development (Vasudevan et al., 2011; Patrick et al., 2014) or healthy aging (Sombric  
33 et al., 2017). In addition, several behavioral studies have shown that the adaptation of spatial measures  
34 can be altered (Malone and Bastian, 2010; Malone et al., 2012; Long et al., 2016) without modifying  
35 the adaptation of temporal gait features. However, the opposite has not been demonstrated. For example,  
36 altering intra-limb measures (i.e., characterizing single leg motion) of timing such as stance time duration  
37 (Afzal et al., 2015; Krishnan et al., 2016) also leads to changes in intra-limb spatial features such as stride  
38 lengths. In sum, the spatial and temporal control of the limb is thought to be dissociable, but it remains  
39 unclear if the adaptation of internal representations of timing can be altered and what is the impact of such  
40 manipulation in the temporal domain on the spatial control of the limb.

41 In this study we aimed to determine the interdependence between the spatial and temporal control of  
42 the limbs during walking, particularly of inter-limb parameters characterizing bipedal coordination. We  
43 hypothesized that spatial and temporal inter-limb features are controlled independently based on previous  
44 studies demonstrating their dissociation. To test this hypothesis, subjects walked on a split-belt treadmill,  
45 which requires the adaptation of spatial and temporal gait features. We further altered the adaptation of one  
46 domain and observed the impact on the adaptation of the other domain.

## 2 MATERIAL AND METHODS

47 We recruited twenty-one healthy young subjects (13 women, 8 men, mean age  $24.69 \pm 4$  years) to  
48 voluntarily participate in this study. Subjects were randomly assigned to three groups ( $n=7$ , each): 1)  
49 control, 2) temporal feedback, 3) spatial feedback to determine if altering the adaptation of limb motion  
50 on either the spatial or the temporal domain with visual feedback during split-belt walking had an impact  
51 on the adaptation of the other domain (Figure 1A). Notably, if the control of these two domains was  
52 dissociable, altering one would not have an effect on the other. Alternatively, if they were interdependent,  
53 modifying the adaptation of one domain not only would have an effect on the targeted domain, but will  
54 also alter the other one. The protocol was approved by the Institutional Review Board of the University of  
55 Pittsburgh and all subjects gave informed consent prior to testing.

### 56 2.1 Experimental Protocol

57 All subjects walked on a split-belt treadmill during four experimental phases: Baseline, Familiarization,  
58 Adaptation, and Post-adaptation. The speed for each belt during these phases is shown in Figure 1B. This  
59 speed profile enabled individuals to walk at an averaged speed of 0.75 m/s throughout the experiment.  
60 In the Baseline phase, individuals walked with the two belts moving at the same speed of 0.75 m/s for  
61 150 strides ( $\sim 3$  min). Recordings from these phase were used as the reference gait for every individual.  
62 In the Familiarization phase, all participants also walked at 0.75 m/s for 150 strides, but only subjects  
63 in the feedback groups received the same visual feedback that they were going to experience during the  
64 subsequent Adaptation phase. This was done to allow feedback groups to become habituated to use the  
65 provided visual feedback to control either spatial (spatial feedback group) or temporal (temporal feedback  
66 group) gait features. In the Adaptation phase, the belts were moved at a 2:1 ratio (1:0.5 m/s) for 600  
67 strides ( $\sim 13$  min). We selected these specific belt speeds because other studies have indicated that they  
68 induce robust sensorimotor adaptation (Reisman et al., 2005; Mawase et al., 2014; Sombric et al., 2017;  
69 Vervoort et al., 2019) and we observed in pilot tests that subjects with visual feedback at these speeds could  
70 successfully modify the spatial and temporal gait features of interest. The (self-reported) dominant leg  
71 walked on the fast belt. In the Post-adaptation phase, all individuals walked with both belts moving at 0.75  
72 m/s for 450 strides ( $\sim 10$  min). This phase was used to quantify gait changes following the Adaptation

73 phase. The treadmill's belts were stopped at the end of each experimental phase. A handrail was placed in  
74 front of the treadmill for safety purposes, but individuals did not hold it while walking. A custom-built  
75 divider was placed in the middle of the treadmill during the entire experimental protocol to prevent subjects  
76 from stepping on the same belt with both legs. Subjects also wore a safety harness (SoloStep, SD) that did  
77 not interfere with their walking (no body weight support).

78 We tested three groups: 1) control group, 2) temporal feedback group, 3) spatial feedback group. The  
79 control group was asked to "just walk" without any specific feedback on subjects' movements. Each subject  
80 in the temporal or spatial feedback groups was instructed to either maintain his/her averaged baseline  
81 step time (temporal feedback group) or averaged baseline step position (spatial feedback group) when the  
82 feedback was on. Step time was defined as the time period from foot landing of one leg to foot landing of  
83 the other leg (Figure 1C). Step position was defined as the sagittal distance between the leading leg's ankle  
84 to the hip at heel strike (Figure 1D). Panels C and D in Figure 1 show sample screen shots of the visual  
85 feedback observed by each group on a screen placed in front of them. More specifically, we permanently  
86 displayed either temporal or spatial targets (blue rectangles) indicating the averaged step time (temporal  
87 feedback group) or averaged step position (spatial feedback group) across legs during baseline walking.  
88 These targets turned green when subjects achieved the targeted baseline values and they turned red when  
89 they did not. A tolerance of  $\pm 0.75\%$  and  $\pm 1.25\%$  of the baseline value was given to subjects in the spatial  
90 and temporal feedback groups, respectively. Yellow lines indicated the actual step position and step time  
91 for each leg at every step. Thus, subjects could appreciate how far they were from the targeted spatial or  
92 temporal value at every step.

## 93 2.2 Data Collection

94 Kinetic and kinematic data were collected to quantify subjects' gait. Kinematic data was collected at  
95 100 Hz with a motion capture system (VICON motion systems, Oxford, UK). Passive reflective markers  
96 were placed bilaterally on bony landmarks at the ankle (malleolus) and the hip (greater trochanter). Kinetic  
97 data was collected at 1000 Hz with the instrumented split-belt treadmill (Bertec, OH). The normal ground  
98 reaction force ( $F_z$ ) was used to detect when the foot landed (i.e., heel strike) or was lifted off (i.e., toe off).  
99 A threshold of 10 N was used for detecting heel strikes and toe offs for data analysis, whereas a threshold  
100 of 30 N was used for counting strides in real-time.

## 101 2.3 Data Analysis

### 102 2.3.1 Gait parameters

103 We computed six gait parameters previously used (Malone et al., 2012) to quantify the adaptation of  
104 spatial and temporal control of the limb during split-belt walking:  $S_{out}$ ,  $T_{out}$ ,  $S_A$ ,  $T_A$ ,  $S_{!A}$ , and  $T_{!A}$ . We  
105 used  $S_{out}$  and  $T_{out}$  because our feedback was designed to directly alter these metrics. For example, subjects  
106 in the spatial feedback group were given feedback to maintain the same baseline step position in both  
107 legs.  $S_{out}$  is, therefore, a good metric of performance for the spatial feedback group since it quantifies  
108 the difference in step positions,  $\alpha_f$  and  $\alpha_s$ , when taking a step with the fast and slow leg, respectively.  
109 Formally expressed:

$$S_{out} = \frac{\alpha_f - \alpha_s}{\alpha_f + \alpha_s} \quad (1)$$

110 By convention,  $S_{out}$  is positive when the fast leg's foot lands farther away from the body when taking a  
111 step than the slow leg's one (i.e.,  $\alpha_f > \alpha_s$ ).  $S_{out}$  is zero during baseline and subjects in the feedback group  
112 were instructed to maintain this value during split-belt walking.

113 Similarly, subjects in the temporal feedback group were given feedback to maintain the same baseline  
114 step times in both legs.  $T_{out}$  is, therefore, a good metric of performance for the temporal feedback group  
115 since it quantifies the difference in step times,  $t_s$  and  $t_f$ . Formally expressed:

$$T_{out} = \frac{t_s - t_f}{t_s + t_f} = \frac{t_s - t_f}{T_{stride}} \quad (2)$$

116 Where  $T_{stride}$  is the stride time (i.e., time interval between two consecutive heel strikes with the same  
117 leg). By convention,  $T_{out}$  is positive when the slow leg's step time is longer than the fast leg's one.  $T_{out}$   
118 is zero during baseline and subjects in the feedback group were instructed to maintain this value during  
119 split-belt walking. It has been previously shown that  $S_{out}$  and  $T_{out}$  are adapted during split-belt walking to  
120 minimize spatial and temporal baseline asymmetries defined as  $S_A$  and  $T_A$ , respectively (Malone et al.,  
121 2012). Therefore, we also quantified  $S_A$  and  $T_A$  because these are adaptive parameters (Malone et al.,  
122 2012; Reisman et al., 2005; Malone and Bastian, 2010) that could be indirectly altered by our spatial and  
123 temporal feedback even if subjects in these groups were not explicitly instructed to modify them.

124  $S_A$  quantifies differences between the legs in where they oscillate with respect to the body. The oscillation  
125 of each leg was computed as the ratio between two distances: step position ( $\alpha$ ) and stride length ( $\gamma$ ) (i.e.,  
126 anterior-posterior distance from foot position at heel strike to ipsilateral foot position at toe off). Thus,  $S_A$   
127 was computed as the difference between these ratios when taking a step with the slow leg (i.e., slow leg  
128 leading) vs. the fast leg (see Eq. 3).

$$S_A = \frac{\alpha_s}{\gamma_s} - \frac{\alpha_f}{\gamma_f} \quad (3)$$

129 In the temporal domain,  $T_A$  quantified the difference in double support times (i.e., period during which  
130 both legs are on the ground) when taking a step with the fast leg ( $DS_s$ ) or slow leg ( $DS_f$ ), respectively  
131 (see Eq. 4). In other words,  $DS_s$  is defined as the time from fast heel strike to slow toe off and  $DS_f$  as the  
132 time from slow heel strike to fast toe off.

$$T_A = DS_s - DS_f \quad (4)$$

133 Lastly, we computed gait parameters defined as  $S_{lA}$  and  $T_{lA}$ , to test the specificity of our feedback.  
134 Namely, it has been previously observed that these parameters do not change as subjects walk in the  
135 split-belt environment (Malone et al., 2012; Reisman et al., 2005; Yokoyama et al., 2018). Thus, these  
136 measures are thought to simply reflect the speed difference between the legs, and hence, we expected that  
137 our feedback would not alter them. Specifically,  $S_{lA}$  quantifies the difference between the fast and slow  
138 leg's ranges of motion  $\gamma_f$  and  $\gamma_s$  during their respective stance phase, which is defined as the interval when  
139 the foot is in contact with the ground. Formally expressed as:

$$S_{!A} = \frac{\gamma_f - \gamma_s}{\gamma_f + \gamma_s} \quad (5)$$

140 The non-adaptive measure in the temporal domain  $T_{!A}$  quantifies the difference between the slow and  
141 fast leg's stance time durations, which we labeled as  $ST_s$  and  $ST_f$ , respectively. Formally expressed as:

$$T_{!A} = \frac{ST_s - ST_f}{T_{stride}} \quad (6)$$

### 142 2.3.2 Outcome measures

143 We computed *steady state* and *after-effects* to respectively characterize the adaptation and recalibration of  
144 walking in the spatial and temporal domains. Both of these outcome measures were computed for each gait  
145 parameter described in the previous section. *Steady state* was used to characterize the spatial and temporal  
146 features of the adapted motor pattern once subjects reached a plateau during split-belt walking. *Steady state*  
147 was computed as the averaged of the last 45 strides during the Adaptation phase, except for the very last  
148 5 strides to exclude transient steps when subjects were told to hold on to the handrail prior to stopping  
149 the treadmill. *After-effects* were used to characterize the recalibration of subjects' internal representation  
150 of the environment (Roemmich and Bastian, 2015) leading to gait changes that were sustained following  
151 split-belt walking compared to baseline spatial and temporal gait features. *After-effects* were computed  
152 as the averaged value for each gait parameter over the first thirty strides of post-adaptation. We used 30  
153 strides, rather than only the initial 1 to 5 strides, because we were interested in characterizing long lasting  
154 after-effects (Long et al., 2015; Mawase et al., 2017; Roemmich and Bastian, 2015). We removed baseline  
155 biases from both measures by subtracting the baseline values for each gait parameter averaged over the last  
156 45 strides during baseline (minus the very last transient 5 strides). This was done to exclude individual  
157 biases before aggregating subjects' outcome measures in every group.

## 158 2.4 Statistical analysis

159 We were interested to determine if altering the adaptation of limb motion on either the spatial or the  
160 temporal domain with visual feedback during split-belt walking had an impact on the adaptation and  
161 recalibration of gait features in the other domain. Thus, we performed separate analysis contrasting  
162 outcome measures of the control (reference) group to either the spatial feedback group or the temporal  
163 feedback group. More specifically, we used separate two-way repeated measures ANOVAs to identify  
164 effects of either spatial or temporal feedback on gait features within the same domain (e.g.,  $T \rightarrow T$ ) or  
165 the other domain (e.g.,  $T \rightarrow S$ ). For example, we did a two-way repeated measures ANOVA to test the  
166 effect of group (i.e., spatial feedback vs. control) and domain specificity (i.e., domain-specific vs. not  
167 domain-specific) on the *steady state* of adaptive parameters  $T_A$  and  $S_A$ . If a significant group effect or  
168 group by domain interaction was found ( $p < 0.05$ ), we used Fisher's LSD *post-hoc* testing to assess if  
169 main effects were driven by differences between the feedback group and reference group in either domain.  
170 We applied a Bonferroni correction to account for multiple comparisons in the *post-hoc* analysis, resulting  
171 in a significance level set to  $\alpha = 0.025$ . Lastly, we performed independent sample t-tests to determine if  
172 *after-effects* were significantly different from baseline since all statistical analyses were done with unbiased

173 data (i.e., baseline bias removed). A significance level was also set to  $\alpha = 0.025$  to account for multiple  
174 comparisons. We used Stata (StataCorp LP, College Station, TX) for all statistical analyses.

### 3 RESULTS

175 *Confirmation of results supporting dissociable representation of spatial and temporal walking features.*

176 Spatial and temporal gait features adapted and recalibrated independently when feedback was used to  
177 alter the spatial control of the limb. This is indicated by the qualitative group differences between the  
178 time courses of  $S_{out}$  during adaptation and post-adaptation (top panels in Figure 2A and 2B, respectively)  
179 contrasting the overlapping time courses of  $T_{out}$  in the control group (red trace) and spatial feedback  
180 group (blue trace) (bottom panels in Figures 2A and 2B). Accordingly, we found a significant group effect  
181 ( $p = 0.0047$ ) and group by domain interaction ( $p = 0.0094$ ) on the steady states of  $S_{out}$  and  $T_{out}$ . *Post-hoc*  
182 analysis indicated that the spatial feedback only reduced the steady state of  $S_{out}$ , ( $S \rightarrow S : p = 0.0002$ ),  
183 but not the steady state of  $T_{out}$  ( $S \rightarrow T : p = 0.3896$ ). The dissociation between spatial and temporal  
184 control was also shown by the after-effects of  $S_{out}$  and  $T_{out}$  in the control vs. spatial feedback groups.  
185 Notably, we found a significant group effect ( $p = 0.0350$ ) and group by domain interaction ( $p = 0.0418$ )  
186 indicating a distinct effect of spatial feedback on the recalibration of  $T_{out}$  and  $S_{out}$ . While both groups  
187 had after-effects different from zero (control group:  $p = 0.0003$ ; spatial feedback group:  $p = 0.0164$ ), the  
188 spatial feedback reduced the after-effects of  $S_{out}$  compared to the control group ( $S \rightarrow S : p = 0.0031$ ). In  
189 contrast, spatial feedback did not change the after-effects of  $T_{out}$  ( $p = 0.9042$ ). In sum, spatial feedback  
190 had a domain-specific effect: it altered the adaptation and recalibration of step position (targeted spatial  
191 parameter) without modifying the adaptation and aftereffects of step time ( $T_{out}$ ).

192 The dissociation in adaptation and recalibration of spatial and temporal representations of walking was  
193 also supported by the analysis of spatial and temporal features known to be adapted by the split-belt task,  
194 but not directly targeted by our feedback. Namely, the spatial feedback also modified the adaptation and  
195 post-adaptation time courses of the symmetry in legs' oscillation, quantified by  $S_A$ , which is expected  
196 given its relation to step position. Note that the time courses of  $S_A$  for the spatial feedback group (blue  
197 trace) and control group (red trace) do not overlap during adaptation and post-adaptation (top panel  
198 Figure 3A and 3B). In contrast, the time courses of double support asymmetry ( $T_A$ ) were not altered  
199 by the spatial feedback, as shown by the overlap of  $T_A$  values during adaptation and post-adaptation of  
200 the temporal feedback and control groups (bottom panel Figure 3A and 3B). Consistently, we found a  
201 significant group by domain interaction in the  $T_A$ 's and  $S_A$ 's steady states ( $p = 0.0189$ ) and a significant  
202 group effect in the  $T_A$ 's and  $S_A$ 's after-effects ( $p = 0.0008$ ). *Post-hoc* analyses revealed that these effects  
203 were driven by group differences in  $S_A$ 's steady state ( $S \rightarrow S_A : p = 0.0033$ ) and  $S_A$ 's after-effects  
204 ( $S \rightarrow S_A : p = 0.0045$ ), rather than group differences in  $T_A$ 's steady state ( $S \rightarrow T_A : p = 0.727$ ) and  $T_A$ 's  
205 after-effects ( $T \rightarrow T_A : p = 0.6341$ ). Thus, after-effects in  $S_A$  and  $T_A$  were significantly different from  
206 zero in all groups (control group:  $T_{Ap} = 0.0044$  and  $S_{Ap} = 0.0009$ ; spatial feedback group:  $T_{Ap} = 0.0007$   
207 and  $S_{Ap} = 0.0542$ ), but only those of  $S_A$  were reduced in the spatial feedback group compared to controls.  
208 These results reiterated that changes in the spatial domain did not modify the temporal control of the limb  
209 in the temporal domain, replicating previous findings (Malone et al., 2012; Long et al., 2016).

210 *New evidence for interdependent representations of spatial and temporal walking features.*

211 Interestingly, we found that spatial and temporal gait features were not independent in their adaptation  
212 and recalibration when feedback was used to alter the temporal control of the limb. This is indicated by the  
213 qualitative differences between the time courses of  $T_{out}$  and  $S_{out}$  during the adaptation (Figure 4A) and

214 post-adaptation phases (Figure 4B). Namely, the control group (red traces) and temporal feedback group  
215 (yellow traces) are different in both spatial and temporal parameters. Consistently, we found a significant  
216 group effect on steady states of  $S_{out}$  and  $T_{out}$  ( $p = 0.0001$ ), highlighted by the black rectangles in Figure  
217 4A. While the temporal feedback group was designed to alter step times, and hence significantly reduce  $T_{out}$   
218 ( $T \rightarrow T : p = 0.0075$ ), we did not anticipate a reduction in the adaptation of  $S_{out}$  ( $T \rightarrow S : p = 0.0003$ )  
219 because this parameter was not directly targeted. The interdependence between spatial and temporal  
220 domains was also shown by the analysis of aftereffects in post-adaptation (Figure 4B). Notably, we found a  
221 significant group ( $p = 0.0008$ ) and group by domain interaction ( $p = 0.0128$ ). *Post-hoc* analyses indicated  
222 that temporal feedback did not change the recalibration of  $T_{out}$  ( $T \rightarrow T : p = 0.673$ ), but altered the  
223 recalibration of  $S_{out}$  ( $T \rightarrow S : p < 0.0001$ ). The non-significant effect on the recalibration of  $T_{out}$   
224 was expected given that aftereffects in this parameter are very short lived resulting in  $T_{out}$  after-effect  
225 values that are non-significantly different from zero (control group:  $p = 0.4322$ ; temporal feedback group:  
226  $p = 0.8550$ ). In contrast, both groups had after-effects in  $S_{out}$  that were significantly different from zero  
227 (control group:  $p = 0.0003$ ; temporal feedback group:  $p = 0.0021$ ); but they were unexpectedly smaller  
228 in the temporal feedback group compared to the control group. In sum, the temporal feedback impact on  
229 adaptation and recalibration of  $S_{out}$  (spatial parameter) indicated an interdependence between the spatial  
230 and temporal control of the limb.

231 The possible interdependence in space and time was further supported by the analysis of spatial and  
232 temporal features known to be adapted by the split-belt task, but not directly targeted by our feedback.  
233 Namely, the temporal feedback also modified the adaptation and post-adaptation time courses of the  
234 symmetry in legs' oscillation, quantified by  $S_A$ , which is a spatial measure related to step position.  
235 Note that the time courses of  $S_A$  for the temporal feedback group (yellow trace) and control group  
236 (red trace) do not overlap during adaptation and post-adaptation (bottom panel Figure 5A and 5B). In  
237 contrast, the time courses of double support asymmetry ( $T_A$ ) were not altered by the temporal feedback, as  
238 shown by the overlap of  $T_A$  values during adaptation and post-adaptation of the temporal feedback and  
239 control groups (top panel Figure 5A and 5B). Consistently, we found a group effect in the  $T_A$ 's and  $S_A$ 's  
240 steady states ( $p = 0.0382$ ) and after-effects ( $p = 0.0050$ ). *Post-hoc* analyses revealed that these effects  
241 were driven by group differences in  $S_A$ 's steady state ( $T \rightarrow S_A : p = 0.0053$ ) and  $S_A$ 's after-effects  
242 ( $T \rightarrow S_A : p = 0.0007$ ), rather than group differences in  $T_A$ 's steady state ( $T \rightarrow T_A : p = 0.6953$ )  
243 and  $T_A$ 's after-effects ( $T \rightarrow T_A : p = 0.7784$ ), which we expected given the relation between  $T_A$  and  
244 the temporal measure (T) directly altered with the temporal feedback. Thus, after-effects in  $S_A$  and  $T_A$   
245 were significantly different from zero in all groups (control group:  $T_{Ap} = 0.0044$  and  $S_{Ap} = 0.0009$ ;  
246 temporal feedback group:  $T_{Ap} = 0.0009$  and  $S_{Ap} = 0.008$ ), but only those of  $S_A$  were reduced in the  
247 temporal feedback group compared to controls. In sum, these results indicate that temporal feedback did  
248 not have a ubiquitous effect in all gait parameters, but it did alter the adaptation and recalibration of the  
249 legs' oscillation, which also characterizes the spatial control of the limb in locomotion.

250 *Temporal feedback modified the split-belt task to a greater extent than the spatial feedback.*

251 Surprisingly, temporal feedback altered the difference in stance times between the legs ( $T_{lA}$ ), whereas the  
252 spatial feedback did not. This was unexpected given previous literature indicating that  $S_{lA}$  and  $T_{lA}$  do not  
253 change as subjects walk in the split-belt environment (Malone et al., 2012; Reisman et al., 2005; Yokoyama  
254 et al., 2018). Thus, we anticipated that either type of feedback (spatial or temporal) would not alter these  
255 "non-adaptive" gait features. Qualitatively, we observed that this was the case for the spatial ( $S_{lA}$ ), but not  
256 for the temporal ( $T_{lA}$ ) "non-adaptive" parameter (Figure 6A). Note that  $T_{lA}$  has a different time course for  
257 the control group (red trace) and the temporal feedback group (yellow trace), whereas  $S_{lA}$  has the same time

258 course for both groups. Consistently, we found a significant group effect ( $p = 0.0010$ ) and group by domain  
259 interaction ( $p = 0.01$ ). *Post-hoc* analysis revealed that the temporal feedback group reached a significantly  
260 lower steady state when compared to the control group ( $T \rightarrow T_{1A} : p < 0.0001$ ), which contrasted the  
261 non-significant differences between the groups in steady state values of  $S_{1A}$  ( $T \rightarrow S_{1A} : p = 0.9878$ ).  
262 Conversely, the spatial feedback group exhibited the non-adaptive behavior of these parameters  $S_{1A}$  and  
263  $T_{1A}$  that we anticipated. Namely, the time courses of  $S_{1A}$  (Figure 6B, top panel) and  $T_{1A}$  (Figure 6B, bottom  
264 panel) were overlapping in these two groups. This similarity is substantiated by the non-significant group  
265 ( $p = 0.7835$ ) or group by domain interaction ( $p = 0.3462$ ) on the steady states of these non-adaptive  
266 measures. In sum, feedback modifying the adaptation of spatial and temporal gait features had a distinct  
267 effect on 'non-adaptive' temporal parameters thought to only depend on the speed difference between the  
268 legs in the split-belt task.

## 4 DISCUSSION

### 269 4.1 Summary

270 Our study confirms previous results suggesting that there are internal representations of space and time  
271 for predictive control of movement. We replicated previous results showing that altering the recalibration  
272 in the spatial domain does not impact the temporal domain. However, we also observed that the opposite  
273 was not true. That is, explicitly reducing the recalibration in the temporal domain altered movement control  
274 in space, suggesting some level of interdependence between these two domains. Interestingly, double  
275 support asymmetry was consistently corrected across the distinct spatio-temporal perturbations that subjects  
276 experienced, whereas spatial asymmetries were not. This indicates that correcting asymmetries in space  
277 and time is prioritized differently by the motor system. Our results are of translational interest because  
278 clinical populations often have greater deficits in either the spatial or the temporal control of the limb and  
279 our findings suggest that they may not be treated in isolation.

### 280 4.2 Separate representations for predictive control of movements in space and time

281 We find that adaptation of movements to a novel walking situation results in the recalibration of internal  
282 representations for predictive control of locomotion; which are expressed as robust after-effects in temporal  
283 and spatial movement features. This is consistent with the idea that the motor system forms internal  
284 representations of space (Marigold and Drew, 2017) and time (Avraham et al., 2017; Breska and Ivry,  
285 2018; Drew and Marigold, 2015) for predictive motor control. Several behavioral studies suggest separate  
286 recalibration of these internal representations of space and time in locomotion because spatial and timing  
287 measures exhibit different adaptation rates in the mature motor system (Malone and Bastian, 2010;  
288 Darmohray et al., 2019) throughout development (Vasudevan et al., 2011; Patrick et al., 2014) or healthy  
289 aging (Sombric et al., 2017). Spatial and temporal recalibration also have distinct generalization patterns  
290 across walking environments (Torres-Oviedo and Bastian, 2010; Mariscal et al., 2018) and most importantly,  
291 altering the adaptation of spatial features does not modify the adaptation and recalibration of temporal ones,  
292 as shown by us and others (Malone et al., 2012; Long et al., 2016). This idea of separate representations  
293 of space and time in locomotion is also supported by clinical and neurophysiological studies indicating  
294 that different neural structures might contribute to the control (Rybak et al., 2006; Lafreniere-Roula and  
295 McCrea, 2005) and adaptation (Vasudevan et al., 2011; Choi et al., 2009; Statton et al., 2018) of the spatial  
296 and temporal control of the limb in locomotion.



### 297 **4.3 Hierarchic control of timing leads to interdependent adaptation of movements in** 298 **space and time**

299 Nonetheless, we also found that explicit control of step timing modifies the adaptation and recalibration  
300 of movements in space. This result directly contradicts the dissociable adaptation of spatial and temporal  
301 features upon explicitly modifying the adaptation of step position (spatial parameter) (Malone et al., 2012;  
302 Long et al., 2016). We find two possible explanations to reconcile these findings. First, there might be a  
303 hierarchical relationship between the spatial and temporal control of the limb, such that timing cannot be  
304 manipulated without obstructing the adaptation of spatial features. This type of hierarchical organization is  
305 supported by a recent study indicating that lesions to interpose cerebellar nuclei altering the adaptation of  
306 double support (temporal parameter) also reduced the after-effects of spatial features (Darmohray et al.,  
307 2019), whereas the recalibration of spatial features can be halted without modifying the temporal ones  
308 (Darmohray et al., 2019). This type of hierarchical organization suggests that the execution of spatial  
309 and temporal control of the limb can be encoded by separate interneuronal networks (Rybak et al., 2006;  
310 Lafreniere-Roula and McCrea, 2005), but the volitional recruitment of those networks cannot occur in  
311 isolation. Second, it is possible that the observed interdependence arose as a byproduct of how we tested  
312 it. Namely, subjects had two possible strategies to maintain equal step times in the asymmetric split  
313 environment: 1) decrease the difference between step positions or 2) increase the difference between swing  
314 speeds. The latter strategy was probably less likely given human tendencies to self-select energetically  
315 optimal walking patterns (Margaria, 1976; Alexander, 1989; Bertram and Ruina, 2001). Notably, individuals  
316 naturally exploit passive dynamics to swing the legs (Perry, 1992a). Thus, increasing swing speed would  
317 have altered dramatically the metabolic cost associated to this phase of the gait cycle (Gottschall and Kram,  
318 2005; Marsh et al., 2004; Umberger, 2010). In the same vain, we inadvertently reduce the stance time  
319 asymmetry associated to split-belt walking with the temporal feedback task. The stance time asymmetry  
320 is thought to be a key component for the spatio-temporal adaptation of walking induced by split-belt  
321 walking (Reisman et al., 2005). Therefore, subjects in the temporal feedback group might have reduced  
322 the adaptation of spatial parameters because the "teaching" signal to update them was reduced. In sum, it  
323 remains an open question the extent to which temporal gait parameters, such as double support, can be  
324 explicitly modulated without altering the spatial control of the limb.

### 325 **4.4 Relevance of double support symmetry over spatial asymmetries**

326 We demonstrated that double support symmetry (i.e.,  $T_A$ ) is recovered in all groups, regardless of the  
327 task. This is in accordance with multiple observations that individuals consistently reduce double support  
328 asymmetries induced by split-belt walking since very early age (Patrick et al., 2014) or after lesions  
329 to cerebral (Reisman et al., 2007) or cerebellar regions (Vasudevan et al., 2011). Only children with  
330 hemispherectomies, where half of the cerebrum is missing, do not correct double support asymmetry when  
331 this is augmented (Choi et al., 2009). The adaptation and after-effects of double support were surprising  
332 to us because previous work showed that halting the adaptation of step position ( $S_{out} \approx 0$ ) limited the  
333 correction of spatial errors (defined as  $S_a$ ) (Malone et al., 2012). In an analogous manner, we anticipated  
334 that preventing the adaptation of step times ( $T_{out} \approx 0$ ) during split-belt walking was going to limit the  
335 adaptation of double support asymmetry (i.e., temporal error (Malone et al., 2012)). However, we observed  
336 that individuals prioritize differently the correction of spatial and temporal asymmetries: they minimize  
337 temporal asymmetries, but not spatial ones. This might be because double support time is the transition  
338 period when the body mass is transferred from one leg to the other, which is demanding in terms of energy  
339 expenditure (Perry, 1992b). Therefore, double support symmetry might be critical for efficient body transfer  
340 between the limbs (Kuo et al., 2005; Ruina et al., 2005). Taken together our results suggests that the motor

341 system prioritizes the maintenance of double support symmetry, which might be critical for balance control  
342 in bipedal locomotion.

#### 343 **4.5 Study implications**

344 We provide a novel approach for manipulating stance time, which is a major deficit in stroke survivors  
345 (Patterson et al., 2008). It would be interesting to determine if this type of feedback overground or on  
346 a regular treadmill could lead to gait improvements post-stroke as those induced by split-belt walking  
347 (Reisman et al., 2013; Lewek et al., 2018). Our results also indicate that manipulating the adaptation  
348 of movements in the temporal domain alters movements in the spatial domain, suggesting that spatial  
349 and temporal deficits in individuals with cortical lesions (Finley et al., 2015; Malone and Bastian, 2014)  
350 cannot be treated in complete isolation. Only the correction of timing asymmetries through error-based  
351 sensorimotor adaptation could occur while preventing the adaptation of spatial ones, as we did in the spatial  
352 feedback group. However, the opposite is not possible, at least with the temporal feedback task that we  
353 used.

### **CONFLICT OF INTEREST STATEMENT**

354 The authors declare that the research was conducted in the absence of any commercial or financial  
355 relationships that could be construed as a potential conflict of interest.

### **AUTHOR CONTRIBUTIONS**

356 M.G. and N.V. equally contributed to data acquisition and processing. They also contributed in the  
357 interpretation of the data and final approval of the version to be published, and agreement to be accountable  
358 for all aspects of the work. G.T. contributions include conception and design of the work, analysis of the  
359 data, writing a complete draft of the manuscript, revising work for important intellectual content, final  
360 approval of the version to be published, and agreement to be accountable for all aspects of the work.

### **FUNDING**

361 The project was funded by National Science Foundation (NSF1535036), and American Heart Association  
362 (AHA 15SDG25710041).

### **ACKNOWLEDGMENTS**

363 The authors acknowledge the valuable input from Pablo Iturralde and Carly Sombric.

### **REFERENCES**

- 364 Afzal, M. R., Oh, M. K., Lee, C. H., Park, Y. S., and Yoon, J. (2015). A Portable Gait Asymmetry  
365 Rehabilitation System for Individuals with Stroke Using a Vibrotactile Feedback. *BioMed Research*  
366 *International* 2015. doi:10.1155/2015/375638
- 367 Alexander, R. M. (1989). Optimization and Gaits in the Locomotion of Vertebrates. *Physiological Reviews*  
368 69, 1199–1227. doi:10.1152/physrev.1989.69.4.1199
- 369 Avraham, G., Leib, R., Pressman, A., Simo, L. S., Karniel, A., Shmuelof, L., et al. (2017). State-Based  
370 Delay Representation and Its Transfer from a Game of Pong to Reaching and Tracking. *Eneuro* 4,  
371 ENEURO.0179–17.2017. doi:10.1523/eneuro.0179-17.2017

- 372 Bertram, J. E. and Ruina, A. (2001). Multiple walking speed-frequency relations are predicted by  
373 constrained optimization. *Journal of Theoretical Biology* 209, 445–453. doi:10.1006/jtbi.2001.2279
- 374 Breska, A. and Ivry, R. B. (2018). Double Dissociation of Single-Interval and Rhythmic Temporal  
375 Prediction in Cerebellar Degeneration and Parkinson’s Disease. *Proceedings of the National Academy of*  
376 *Sciences* 115, 12283–12288. doi:10.1073/pnas.1810596115
- 377 Choi, J. T., Vining, E. P., Reisman, D. S., and Bastian, A. J. (2009). Walking Flexibility after  
378 Hemispherectomy: Split-belt Treadmill Adaptation and Feedback Control. *Brain* 132, 722–733.  
379 doi:10.1093/brain/awn333
- 380 Darmohray, D. M., Jacobs, J. R., Marques, H. G., and Carey, M. R. (2019). Spatial and Temporal  
381 Locomotor Learning in Mouse Cerebellum Article Spatial and Temporal Locomotor Learning in Mouse  
382 Cerebellum. *Neuron* 102, 1–15. doi:10.1016/j.neuron.2019.01.038
- 383 Drew, T. and Marigold, D. S. (2015). Taking the Next Step: Cortical Contributions to the Control of  
384 Locomotion. *Current Opinion in Neurobiology* 33, 25–33. doi:10.1016/j.conb.2015.01.011
- 385 Finley, J. M., Long, A., Bastian, A. J., and Torres-Oviedo, G. (2015). Spatial and Temporal  
386 Control Contribute to Step Length Asymmetry during Split-Belt Adaptation and Hemiparetic Gait.  
387 *Neurorehabilitation and Neural Repair* 29, 786–795. doi:10.1177/1545968314567149
- 388 Gottschall, J. S. and Kram, R. (2005). Energy Cost and Muscular Activity Required for Leg Swing during  
389 Walking. *Journal of Applied Physiology* 99, 23–30. doi:10.1152/jappphysiol.01190.2004
- 390 Iturralde, P. A. and Torres-Oviedo, G. (2019). Corrective Muscle Activity Reveals Subject-Specific  
391 Sensorimotor Recalibration. *bioRxiv* doi:10.1101/372359
- 392 Krishnan, V., Khoo, I., Marayong, P., DeMars, K., and Cormack, J. (2016). Gait Training in Chronic  
393 Stroke Using Walk-Even Feedback Device: A Pilot Study. *Neuroscience Journal* 2016, 1–8. doi:10.  
394 1155/2016/6808319
- 395 Kuo, A. D., Donelan, M., and Ruina, A. (2005). Energetic Consequences of Walking Like an  
396 Inverted Pendulum : Step-to-Step Transitions Energetic Consequences of Walking Like an Inverted  
397 Pendulum : Step-to-Step Transitions. *Excercise and Sports Sciences* 33, 88–97. doi:10.1097/  
398 00003677-200504000-00006
- 399 Lafreniere-Roula, M. and McCrea, D. A. (2005). Deletions of Rhythmic Motoneuron Activity During  
400 Fictive Locomotion and Scratch Provide Clues to the Organization of the Mammalian Central Pattern  
401 Generator. *Journal of Neurophysiology* 94, 1120–1132. doi:10.1152/jn.00216.2005
- 402 Lewek, M. D., Braun, C. H., Wutzke, C. J., and Giuliani, C. (2018). The Role of Movement Errors in  
403 Modifying Spatiotemporal Gait Asymmetry Post-Stroke: A Randomized Controlled Trial. *Clinical*  
404 *Rehabilitation* 32, 87–97. doi:10.1016/j.biomaterials.2016.06.015.Tunable
- 405 Long, A. W., Finley, J. M., and Bastian, A. J. (2015). A Marching-Walking Hybrid Induces Step Length  
406 Adaptation and Transfers to Natural Walking. *Journal of Neurophysiology* doi:10.1152/jn.00779.2014
- 407 Long, A. W., Roemmich, R. T., and Bastian, A. J. (2016). Blocking Trial-by-Trial Error Correction does  
408 not Interfere with Motor Learning in Human Walking. *Journal of Neurophysiology* , 2341–2348doi:10.  
409 1152/jn.00941.2015
- 410 Malone, L. A. and Bastian, A. J. (2010). Thinking About Walking: Effects of Conscious Correction Versus  
411 Distraction on Locomotor Adaptation. *Journal of Neurophysiology* , 1954–1962doi:10.1152/jn.00832.  
412 2009
- 413 Malone, L. A. and Bastian, A. J. (2014). Spatial and Temporal Asymmetries in Gait Predict Split-belt  
414 Adaptation Behavior in Stroke. *Neurorehabilitation and Neural Repair* 28, 230–240. doi:10.1177/  
415 1545968313505912

- 416 Malone, L. A., Bastian, A. J., and Torres-Oviedo, G. (2012). How does the Motor System Correct for  
417 Errors in Time and Space during Locomotor Adaptation? *Journal of Neurophysiology* 108, 672–683.  
418 doi:10.1152/jn.00391.2011
- 419 Margaria, R. (1976). Biomechanics and Energetics of Muscular Exercise
- 420 Marigold, D. S. and Drew, T. (2017). Posterior Parietal Cortex Estimates the Relationship between Object  
421 and Body Location during Locomotion. *eLife* 6, 1–24. doi:10.7554/elife.28143
- 422 Mariscal, D. M., Iturralde, P. A., and Torres-Oviedo, G. (2018). Augmenting Cognitive Load during  
423 Split-belt Walking Increases the Generalization of Motor Memories across Walking Contexts. *bioRxiv*  
424 doi:10.1101/470930
- 425 Marsh, R. L., Ellerby, D. J., Carr, J. A., Henry, H. T., and Buchanan, C. I. (2004). Partitioning the  
426 Energetics of Walking and Running: Swinging the Limbs Is Expensive. *Science* 303, 80–83. doi:10.  
427 1126/science.1090704
- 428 Mawase, F., Bar-Haim, S., and Shmuelof, L. (2017). Formation of Long-Term Locomotor Memories Is  
429 Associated with Functional Connectivity Changes in the Cerebellar–Thalamic–Cortical Network. *The*  
430 *Journal of Neuroscience* 37, 349–361. doi:10.1523/jneurosci.2733-16.2017
- 431 Mawase, F., Shmuelof, L., Bar-Haim, S., and Karniel, A. (2014). Savings in Locomotor Adaptation  
432 Explained by Changes in Learning Parameters Following Initial Adaptation. *Journal of Neurophysiology*  
433 111, 1444–1454. doi:10.1152/jn.00734.2013
- 434 Patrick, S. K., Musselman, K. E., Tajino, J., Ou, H.-C., Bastian, A. J., and Yang, J. F. (2014). Prior  
435 Experience but Not Size of Error Improves Motor Learning on the Split-Belt Treadmill in Young  
436 Children. *PLoS ONE* 9, e93349. doi:10.1371/journal.pone.0093349
- 437 Patterson, K. K., Parafianowicz, I., Danells, C. J., Closson, V., Verrier, M. C., Staines, W. R., et al. (2008).  
438 Gait Asymmetry in Community-Ambulating Stroke Survivors. *Archives of Physical Medicine and*  
439 *Rehabilitation* 89, 304–310. doi:10.1016/j.apmr.2007.08.142
- 440 Perry, J. (1992a). Energy Conservation. In *Gait Analysis: Normal and Pathological Function* (Thorofare,  
441 NJ: Slack Incorporated), chap. 2. 38–47
- 442 Perry, J. (1992b). Total Limb Function. In *Gait Analysis: Normal and Pathological Function* (Thorofare,  
443 NJ: Slack Incorporated), chap. 9. 149–167
- 444 Reisman, D. S., Block, H. J., and Bastian, A. J. (2005). Interlimb Coordination During Locomotion: What  
445 Can be Adapted and Stored? *Journal of Neurophysiology* 94, 2403–2415. doi:10.1152/jn.00089.2005
- 446 Reisman, D. S., McLean, H., Keller, J., Danks, K. A., and Bastian, A. J. (2013). Repeated Split-belt  
447 Treadmill Training Improves Poststroke Step Length Asymmetry. *Neurorehabilitation and Neural*  
448 *Repair* 27, 460–468. doi:10.1177/1545968312474118
- 449 Reisman, D. S., Wityk, R., Silver, K., and Bastian, A. J. (2007). Locomotor Adaptation on a Split-belt  
450 Treadmill can Improve Walking Symmetry Post-Stroke. *Brain* doi:10.1093/brain/awm035
- 451 Roemmich, R. T. and Bastian, A. J. (2015). Two Ways to Save a Newly Learned Motor Pattern. *Journal of*  
452 *Neurophysiology* 113, 3519–3530. doi:10.1152/jn.00965.2014
- 453 Ruina, A., Bertram, J. E. A., and Srinivasan, M. (2005). A Collisional Model of the Energetic Cost of  
454 Support Work Qualitatively Explains Leg Sequencing in Walking and Galloping, Pseudo-elastic Leg  
455 Behavior in Running and the Walk-to-run Transition. *Journal of Theoretical Biology* 237, 170–192.  
456 doi:10.1016/j.jtbi.2005.04.004
- 457 Rybak, I. A., Shevtsova, N. A., Lafreniere-Roula, M., and McCrea, D. A. (2006). Modelling Spinal  
458 Circuitry Involved in Locomotor Pattern Generation: Insights from Deletions during Fictive Locomotion.  
459 *Journal of Physiology* 577, 617–639. doi:10.1113/jphysiol.2006.118703

- 460 Sombric, C. J., Harker, H. M., Sparto, P. J., and Torres-Oviedo, G. (2017). Explicit Action Switching  
461 Interferes with the Context-Specificity of Motor Memories in Older Adults. *Frontiers in Aging*  
462 *Neuroscience* 9. doi:10.3389/fnagi.2017.00040
- 463 Statton, M. A., Vazquez, A., Morton, S. M., Vasudevan, E. V., and Bastian, A. J. (2018). Making  
464 Sense of Cerebellar Contributions to Perceptual and Motor Adaptation. *Cerebellum* 17, 111–121.  
465 doi:10.1007/s12311-017-0879-0
- 466 Torres-Oviedo, G. and Bastian, A. J. (2010). Seeing Is Believing: Effects of Visual Contextual Cues  
467 on Learning and Transfer of Locomotor Adaptation. *Journal of Neuroscience* 30, 17015–17022.  
468 doi:10.1523/JNEUROSCI.4205-10.2010
- 469 Umberger, B. R. (2010). Stance and Swing Phase Costs in Human Walking. *Journal of The Royal Society*  
470 *Interface* 7, 1329–1340. doi:10.1098/rsif.2010.0084
- 471 Vasudevan, E. V., Torres-Oviedo, G., Morton, S. M., Yang, J. F., and Bastian, A. J. (2011). Younger Is Not  
472 Always Better: Development of Locomotor Adaptation from Childhood to Adulthood. *The Journal of*  
473 *Neuroscience* 31, 3055–3065. doi:10.1523/JNEUROSCI.5781-10.2011
- 474 Vervoort, D., den Otter, A. R., Buurke, T. J. W., Vuillermé, N., Hortobágyi, T., and Lamoth, C. J. C. (2019).  
475 Effects of Aging and Task Prioritization on Split-Belt Gait Adaptation. *Frontiers in Aging Neuroscience*  
476 11, 1–12. doi:10.3389/fnagi.2019.00010
- 477 Yokoyama, H., Sato, K., Ogawa, T., Yamamoto, S. I., Nakazawa, K., and Kawashima, N. (2018).  
478 Characteristics of the Gait Adaptation Process due to Split-belt Treadmill Walking under a Wide Range  
479 of Right-left Speed Ratios in Humans. *PLoS ONE* 13, 1–14. doi:10.1371/journal.pone.0194875

## FIGURE CAPTIONS

480 Figure 1: Expected outcomes, Paradigm and Feedback Visualization. **(A)** Expected outcomes for dissociable  
481 and interdependent internal representations of space and time. If dissociable, the feedback manipulation  
482 will only affect the targeted domain without changing the other domain. For example, spatial feedback  
483 (indicated with blue outline) would alter spatial features (S) of the motor pattern while temporal ones (T)  
484 remain invariant. On the other hand, if the domains are interdependent, feedback manipulation of one  
485 domain will also alter the other domain. For example, spatial feedback modifying spatial features of the  
486 motor pattern would also change temporal ones. **(B)** Split-belt walking paradigm used in all groups. Dashed  
487 lines separate the different experimental phases. All groups experienced the same number of strides during  
488 each phase (Baseline: 150, Familiarization: 150, Adaptation: 600, and Post-adaptation: 450). The two belts  
489 moved at the same speed ( $0.75m/s$ ) during the Baseline and Familiarization phases. Only subjects in the  
490 feedback groups walked while observing their movements on a TV screen placed directly in front of them  
491 (Feedback On) during the familiarization phase. The feedback to these groups was also given during the  
492 Adaptation phase (gray shaded area) during which one belt (fast belt) moved at  $1m/s$  and the other one  
493 (slow belt) moved at  $0.5m/s$ . Finally, during Post-adaptation subjects walked again with the two belts  
494 moving at the same speed ( $0.75m/s$ ). **(C-D)** Visual feedback schematic. Schematic of the legs in the top  
495 row illustrate the step position (e.g.,  $\alpha_f$  and  $\alpha_s$ ) and step time (e.g.,  $t_s$ ), which were the walking features  
496 used in the spatial and temporal feedback tasks, respectively. Bottom rows in panel C and D illustrate the  
497 screen shots observed by individuals in the spatial feedback group (Panel C) or in the temporal feedback  
498 group (Panel D). Blue rectangles indicated the target step position or step time value that subjects had to  
499 achieve with each leg. These rectangles turned green when subjects met the desired step position or step  
500 time values and red when they did not. Yellow lines indicated either the step position value (Panel C) or the  
501 step time value (Panel D) at heel strike (HS) when taking a step with the right or left leg (e.g., left leg's

502 step position is shown in the screen shot #1). In the example shown, the step position was correct for the  
503 right leg but not for the left leg. The light grey progression bars showed in real-time either the the distance  
504 from the ankle to the hip markers as subjects swing the leg forward (Panel C) or the time that the subject  
505 had spent on the standing leg since it hit the ground (Panel D).

506 Figure 2: Adaptation and Post-adaptation of the parameters  $S_{out}$  (targeted) and  $T_{out}$  in the spatial feedback  
507 and control groups. Left schematics summarize the effect of altering the adaptation of step positions in  
508 the adaptation (Panel A) and recalibration (Panel B) of spatial and temporal measures. Stride-by-stride  
509 time courses of  $S_{out}$  and  $T_{out}$  during adaptation and post-adaptation. Each data point in the time courses  
510 represents the average of five consecutive strides and shaded areas around the data points represent the  
511 standard errors. Bar plots indicate the mean average behavior in the epochs of interest (indicated with the  
512 black rectangles), gray dots indicate values for individual subjects, and vertical black lines are standard  
513 errors. Lines connecting the bar plots illustrate the significant group by domain interaction, while horizontal  
514 lines between bars illustrate significant differences between groups ( $p < 0.025$ ). **A)** Steady States values  
515 of  $S_{out}$  and  $T_{out}$ : We found a significant group effect and group by domain interaction driven by group  
516 differences in  $S_{out}$ . **B)** After-effect values of  $S_{out}$  and  $T_{out}$ : We found a significant group effect and group  
517 by domain interaction driven by group differences in  $S_{out}$ . Asterisks indicate that after-effect values are  
518 significantly different from zero ( $p < 0.025$ ) according to *post-hoc* analysis.

519 Figure 3: Adaptation and Post-adaptation for the non-targeted parameters  $S_A$  and  $T_A$  in the spatial  
520 feedback and control groups. Left schematics summarize the effect of altering the adaptation of step  
521 positions on the adaptation (Panel A) and recalibration (Panel B) of non-targeted spatial and temporal  
522 measures. Stride-by-stride time courses of  $S_A$  and  $T_A$  during adaptation and post-adaptation. Each data  
523 point in the time courses represents the average of five consecutive strides and shaded areas around the  
524 data points represent the standard errors. Bar plots indicate the mean average behavior in the epochs of  
525 interest (indicated with the black rectangles), the gray dots indicate values for individual subjects, and  
526 vertical black lines are standard errors. Lines connecting the bar plots illustrate the significant group by  
527 domain interaction, while horizontal lines between bars illustrate significant differences between groups  
528 ( $p < 0.025$ ). **A)** Steady States for  $S_A$  and  $T_A$ : We found a significant group by domain interaction driven  
529 by differences between the spatial feedback and control group in the non-targeted spatial motor output  
530 (adaptive motor output). **B)** After-Effects values of  $S_A$  and  $T_A$ : We found a significant group effect  
531 driven by differences in  $S_A$ . Asterisks indicate that after-effect values are significantly different from zero  
532 ( $p < 0.025$ ) according to *post-hoc* analysis.

533 Figure 4: Adaptation and Post-adaptation of the parameters  $T_{out}$  (targeted) and  $S_{out}$  in the temporal  
534 feedback and control groups. Left schematics summarize the effect of altering the adaptation of step times  
535 in the adaptation (Panel A) and recalibration (Panel B) of temporal and spatial measures. Stride-by-stride  
536 time courses of  $T_{out}$  and  $S_{out}$  during adaptation and post-adaptation. Each data point in the time courses  
537 represents the average of five consecutive strides and shaded areas around the data points represent the  
538 standard errors. Bar plots indicate the mean average behavior in the epochs of interest (indicated with the  
539 black rectangles), the gray dots indicate values for individual subjects, and vertical black lines are standard  
540 errors. Lines connecting the bar plots illustrate the significant group by domain interaction, while horizontal  
541 lines between bars illustrate significant differences between groups ( $p < 0.025$ ). **A)** Steady States values  
542 of  $T_{out}$  and  $S_{out}$ : We found a significant group effect driven by differences between the temporal feedback  
543 and control group in the two domains. **B)** After-effect values of  $T_{out}$  and  $S_{out}$ : We found a significant group  
544 effect and group by domain interaction driven by differences between the temporal feedback and control

545 group in  $S_{out}$ . Asterisks indicate that after-effect values are significantly different from zero ( $p < 0.025$ )  
546 according to *post-hoc* analysis.

547 Figure 5: Adaptation and Post-adaptation for the non-targeted parameters  $T_A$  and  $S_A$  in the temporal  
548 feedback and control groups. Left schematics summarize the effect of altering the adaptation of step time on  
549 the adaptation (Panel A) and recalibration (Panel B) of non-targeted spatial and temporal measures. Stride-  
550 by-stride time courses of  $T_A$  and  $S_A$  during adaptation and post-adaptation. Each data point in the time  
551 courses represents the average of five consecutive strides and shaded areas around the data points represent  
552 the standard errors. Bar plots indicate the mean average behavior in the epochs of interest (indicated  
553 with the black rectangles), the gray dots indicate values for individual subjects, and vertical black lines  
554 are standard errors. Lines connecting the bar plots illustrate the significant group by domain interaction,  
555 while horizontal lines between bars illustrate significant differences between groups ( $p < 0.025$ ). **A)**  
556 Steady State values of  $T_A$  and  $S_A$ : We found a significant group effect driven by differences between the  
557 temporal feedback and control group in the non-targeted spatial motor output (adaptive motor output). **B)**  
558 After-Effects of  $T_A$  and  $S_A$ : We found a significant group effect and group by domain interaction driven by  
559 differences in  $S_A$ . Asterisks indicate that after-effect values are significantly different from zero ( $p < 0.025$ )  
560 according to *post-hoc* analysis.

561 Figure 6: Adaptation of  $T_{1A}$  and  $S_{1A}$  measures that were non-targeted parameters in temporal feedback  
562 and control group (Panel A) and spatial feedback and control group (Panel B). Left schematics summarize  
563 the effect of altering the adaptation of step times or step positions on "non-adaptive" temporal and spatial  
564 measures. Stride-by-stride time courses of  $T_{1A}$  and  $S_{1A}$  during adaptation. Each data point in the time  
565 courses represents the average of five consecutive strides and shaded areas around the data points represent  
566 the standard errors. Bar plots indicate the mean average behavior in the epochs of interest (indicated with  
567 the black rectangles), the gray dots indicate values for individual subjects, and vertical black lines are  
568 standard errors. Lines connecting the bar plots illustrate the significant group by domain interaction, while  
569 horizontal lines between bars illustrate significant differences between groups ( $p < 0.025$ ). **A)** Steady  
570 State values of  $T_{1A}$  and  $S_{1A}$ : We found a significant group effect and group by domain interaction driven by  
571 differences between the temporal feedback and control group in the non-targeted temporal motor output  
572 (adaptive motor output). **B)** Steady State values of  $S_{1A}$  and  $T_{1A}$ : We did not find a significant group effect or  
573 group by domain interaction found for the spatial feedback and control group in the parameters of interest.

## FIGURES

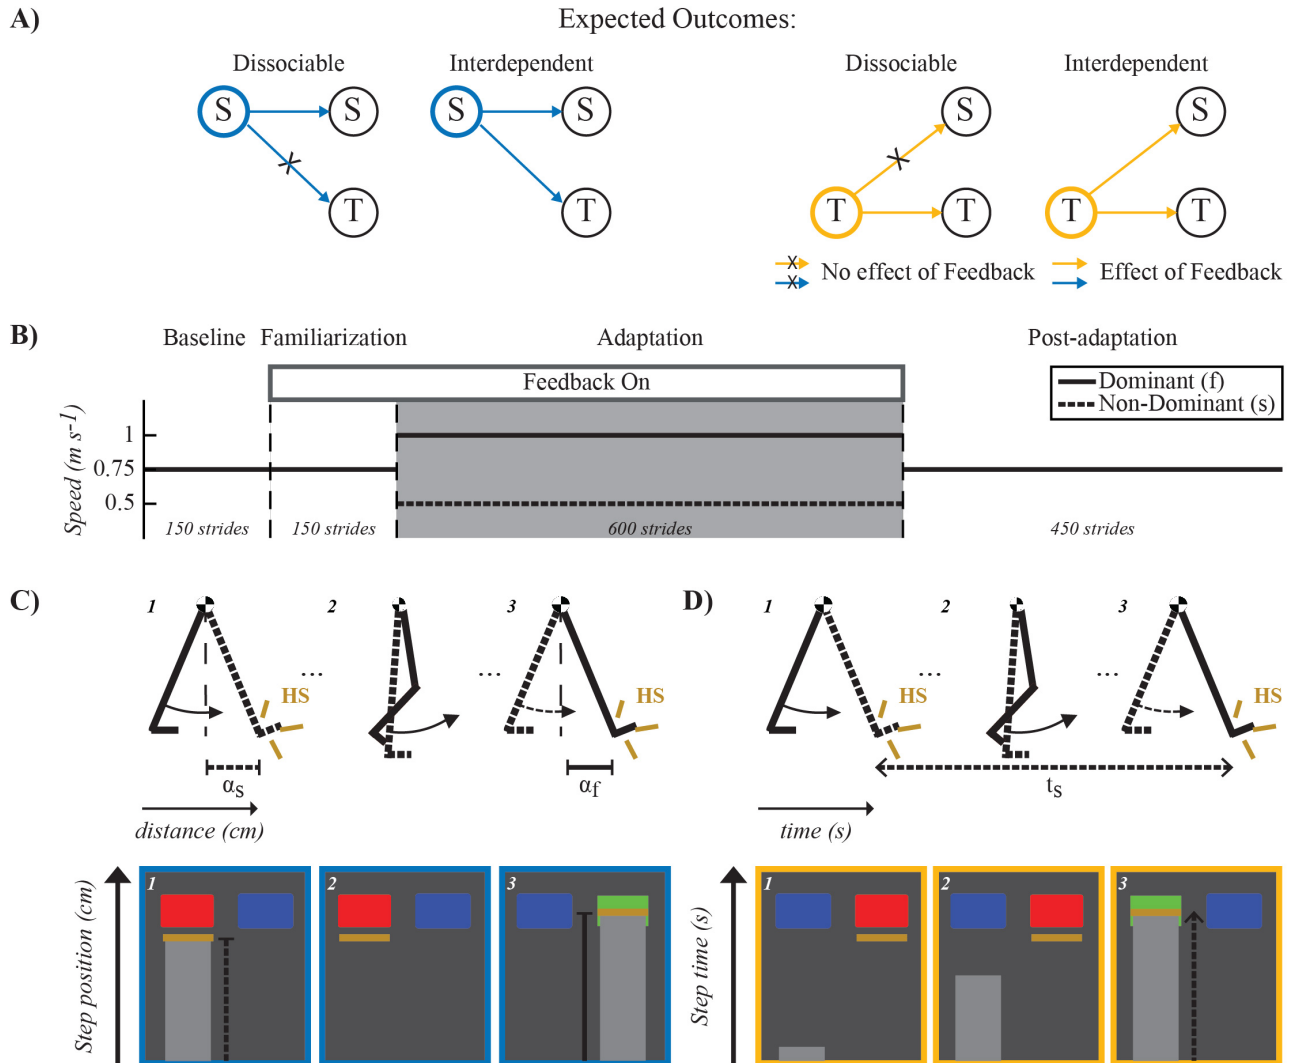

**Figure 1.**



A)

Outcome:

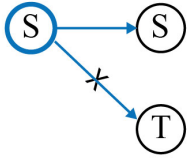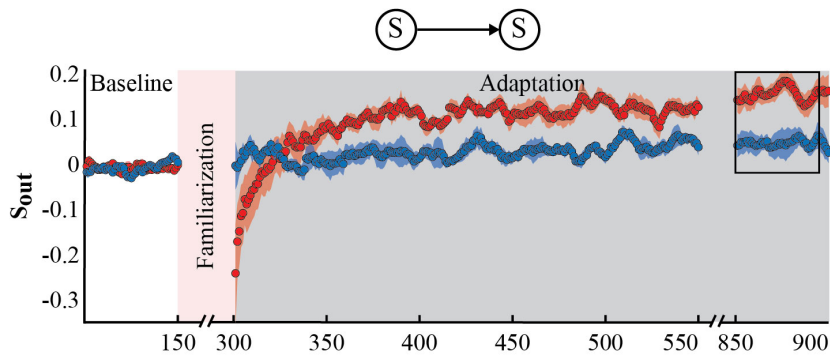

Steady State

—\*— No effect of SF  
— Effect of SF

S: Targeted spatial measure  
T: Temporal measure

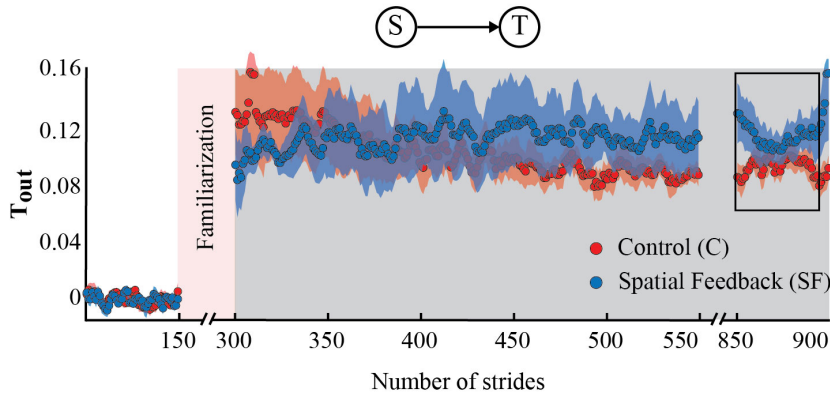

B)

Outcome:

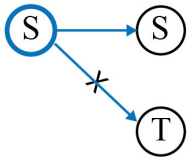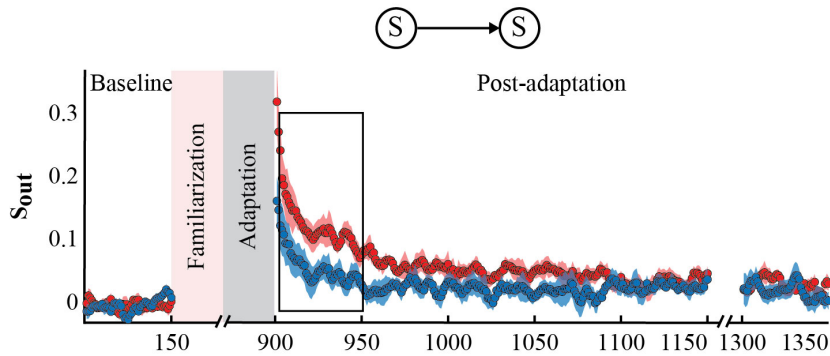

After-Effects

—\*— No effect of SF  
— Effect of SF

S: Targeted spatial measure  
T: Temporal measure

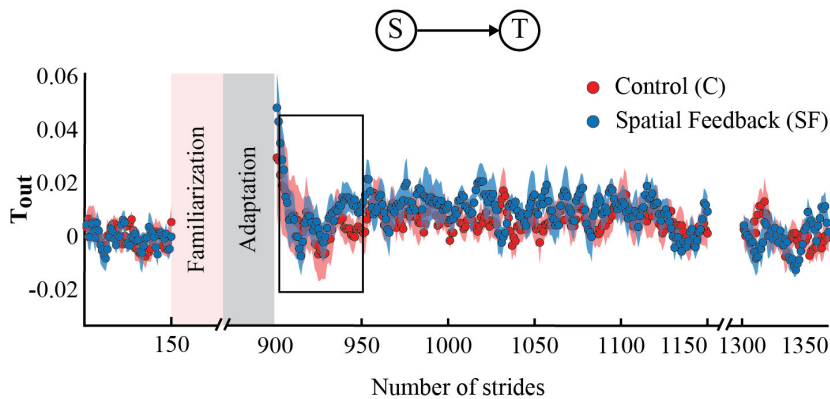

Figure 2.

A)

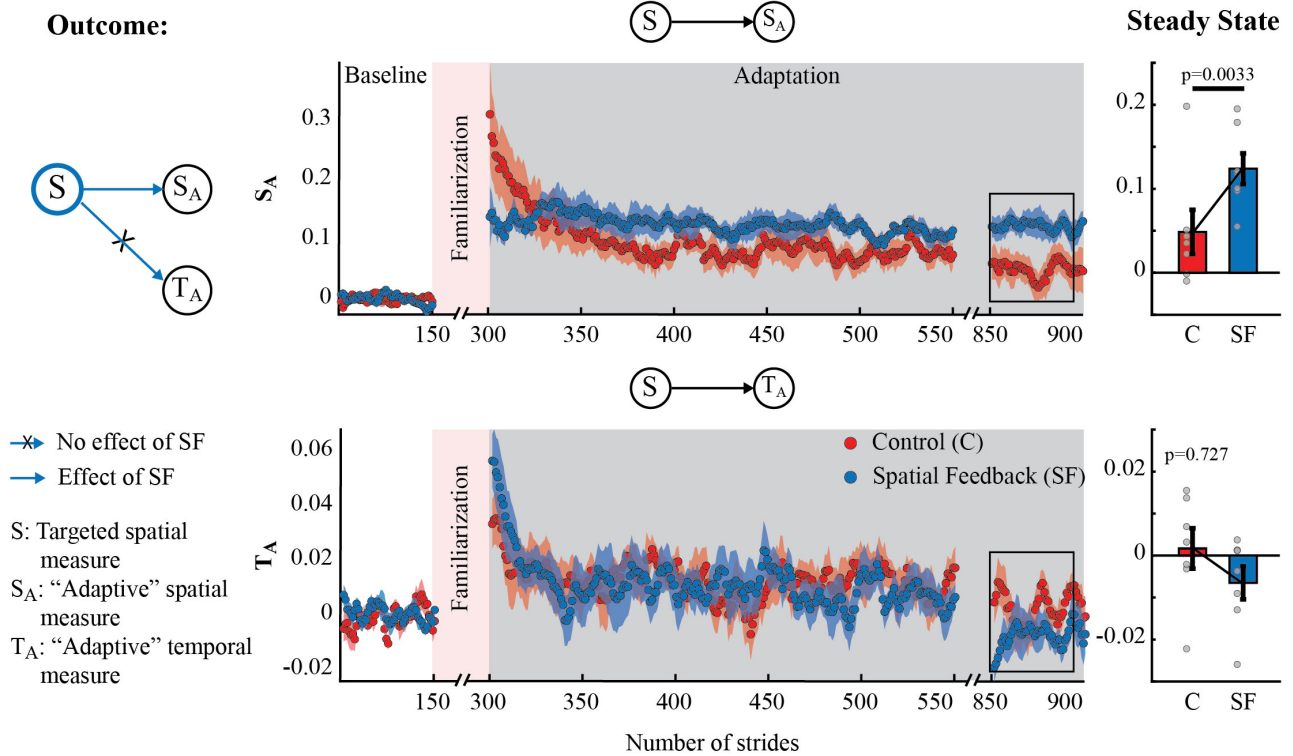

B)

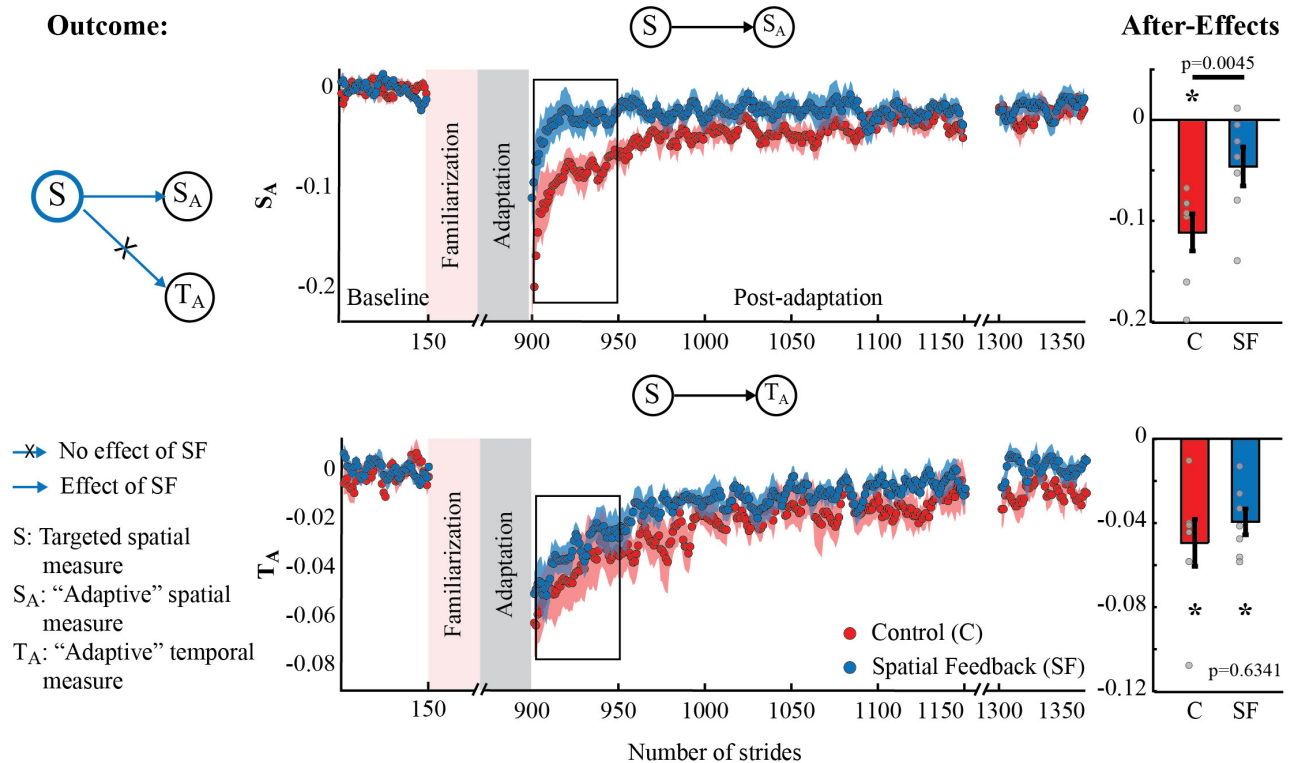

Figure 3.

A)

Outcome:

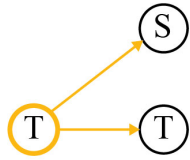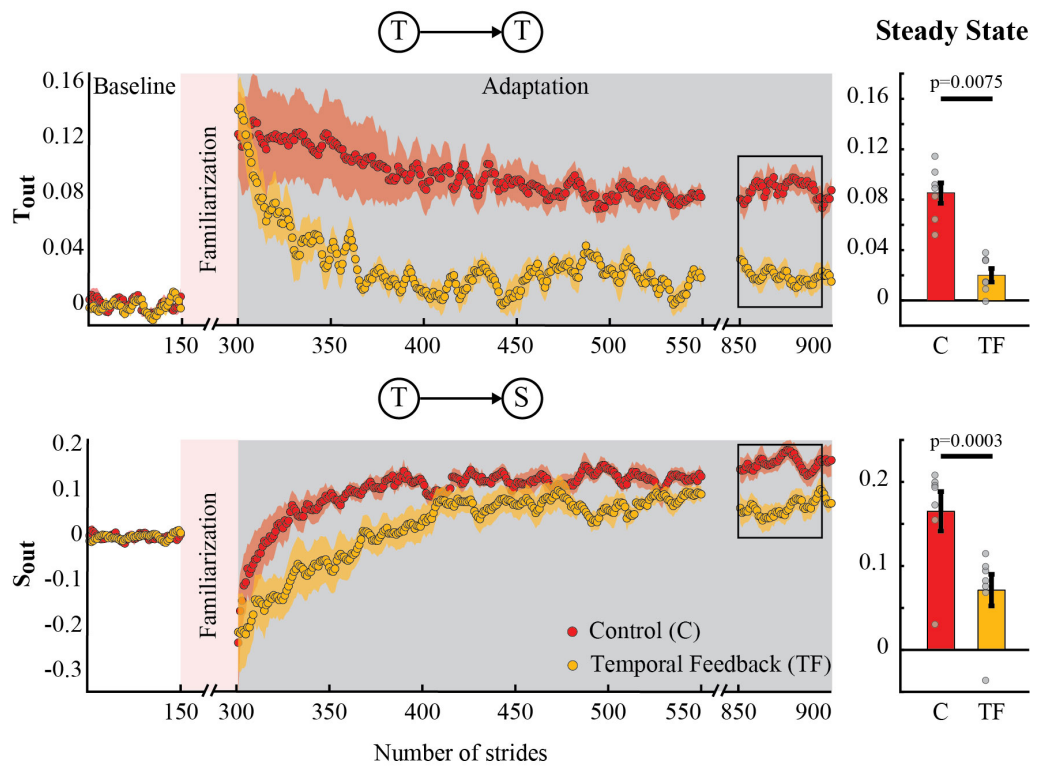

B)

Outcome:

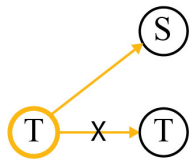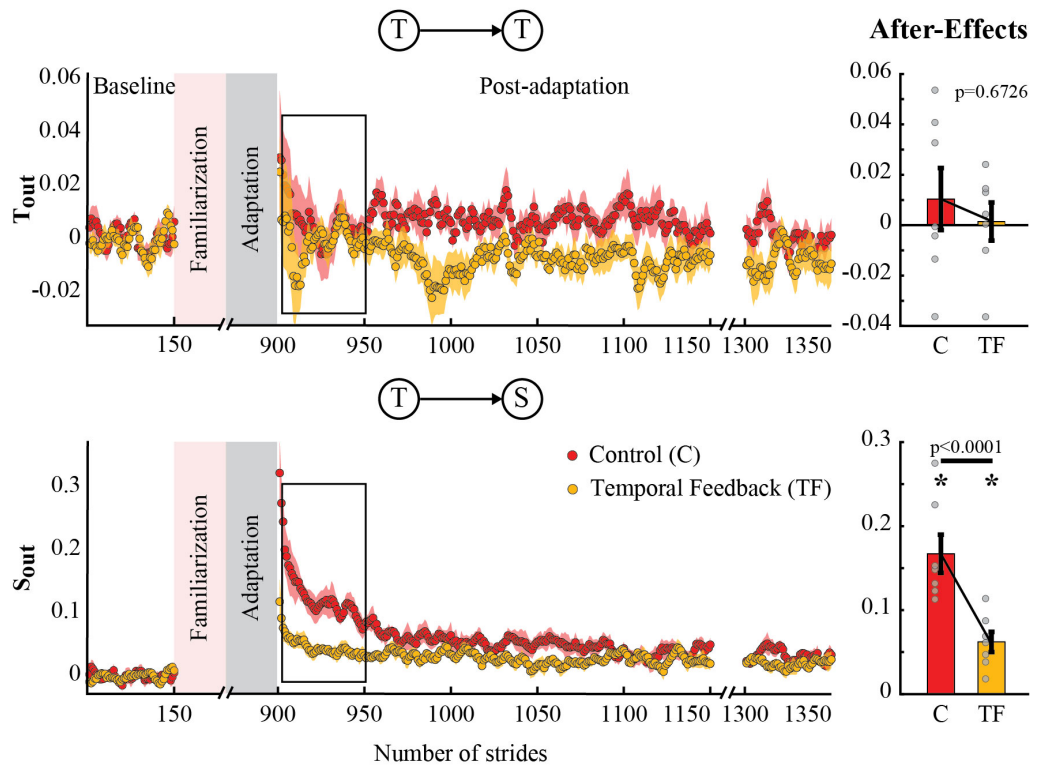

Figure 4.

A)

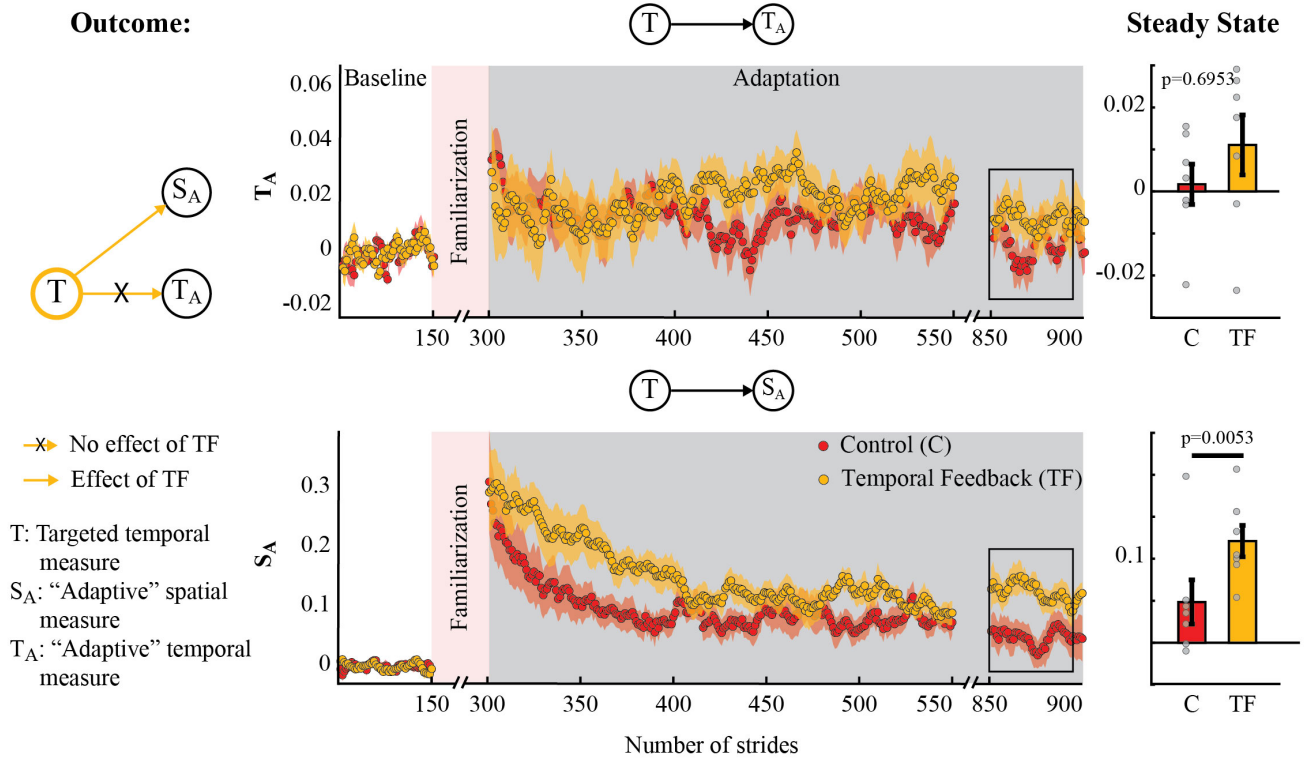

B)

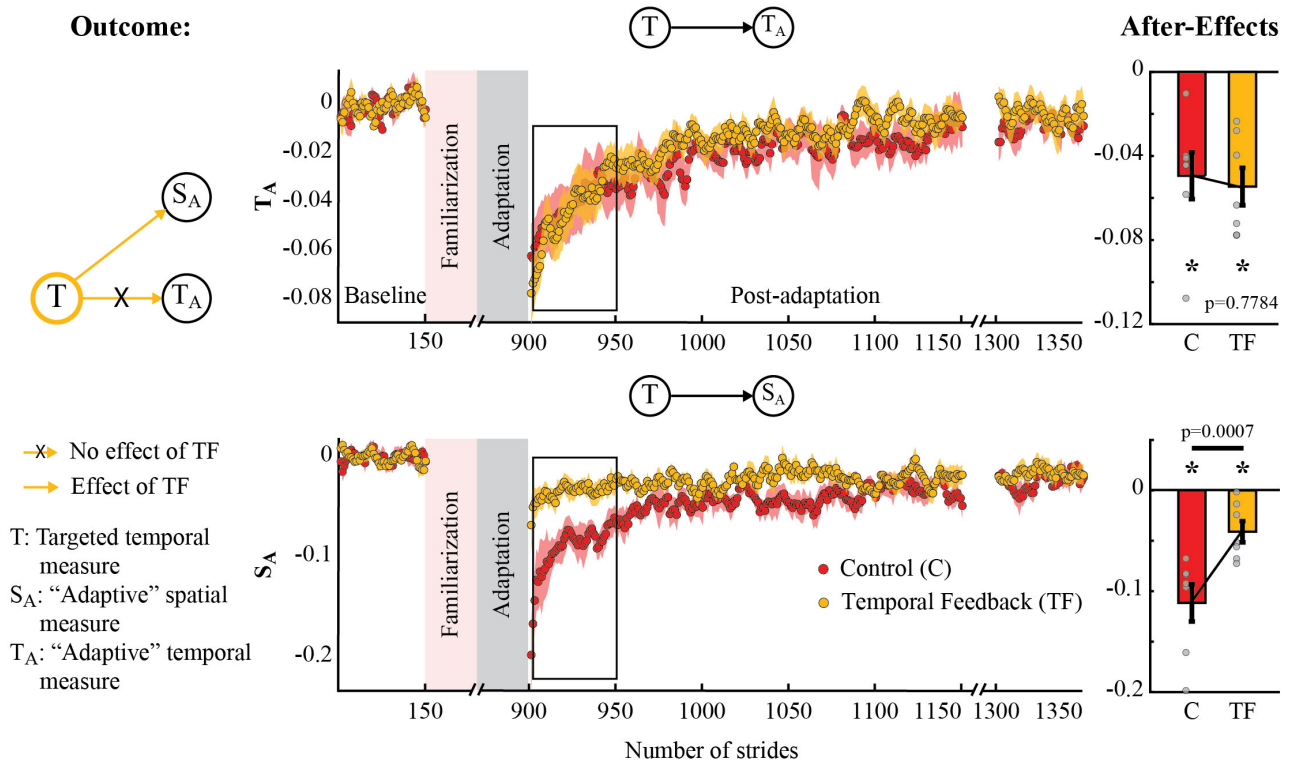

Figure 5.

A)

Outcome:

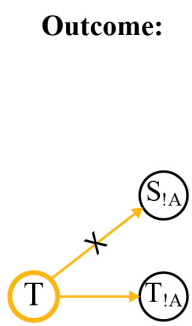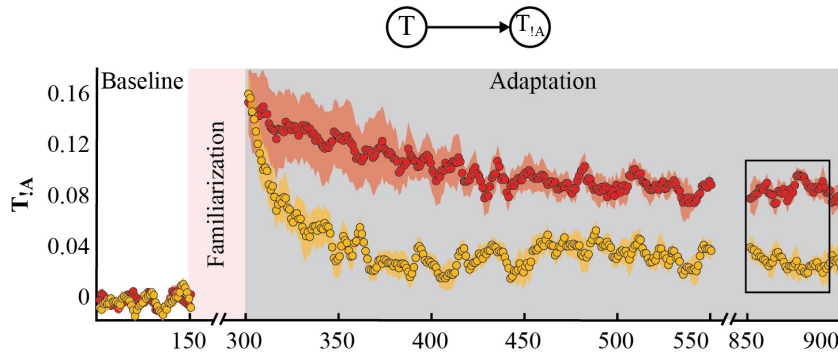

Steady State

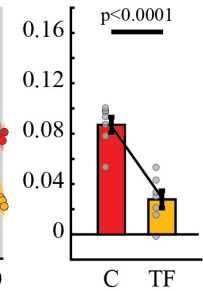

- X- No effect of TF
- > Effect of TF

T: Targeted temporal measure  
 $S_{1A}$ : "Non-adaptive" spatial measure  
 $T_{1A}$ : "Non-Adaptive" temporal measure

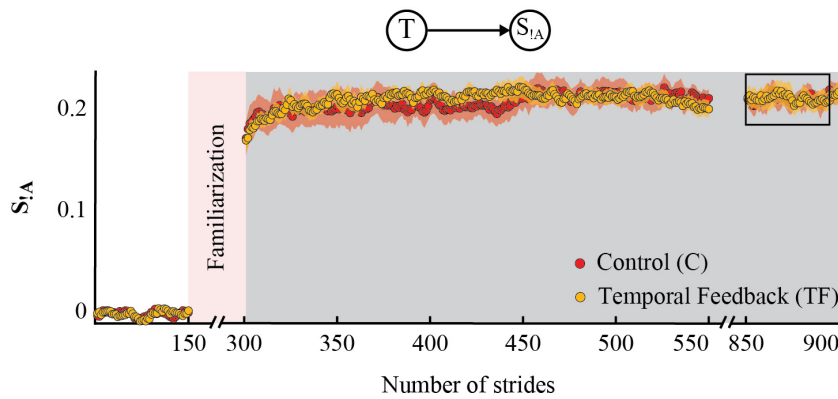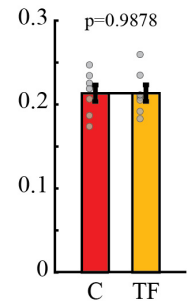

B)

Outcome:

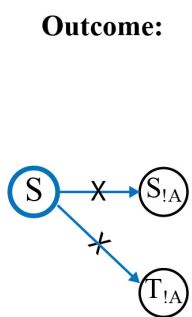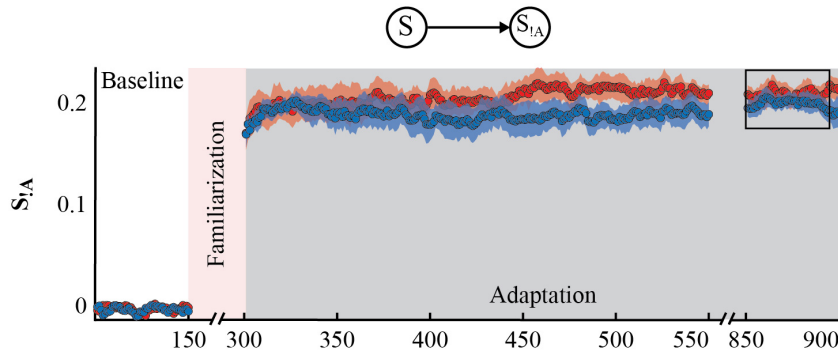

Steady State

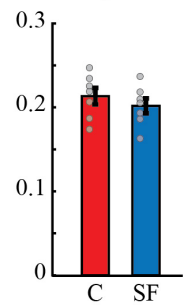

- X- No effect of SF
- > Effect of SF

S: Targeted spatial measure  
 $S_{1A}$ : "Non-adaptive" spatial measure  
 $T_{1A}$ : "Non-adaptive" temporal measure

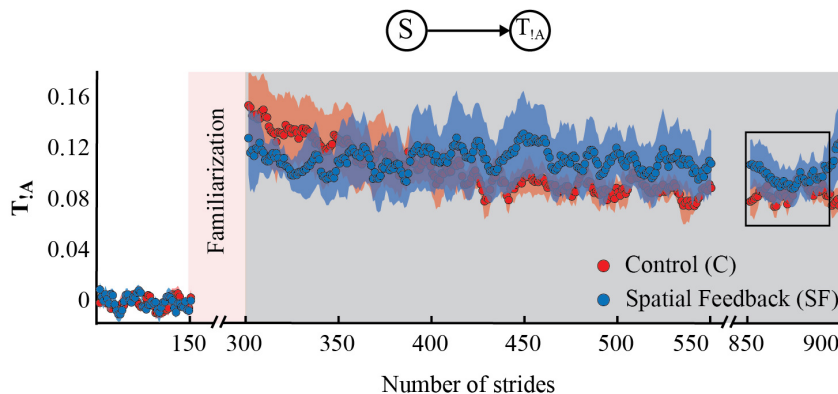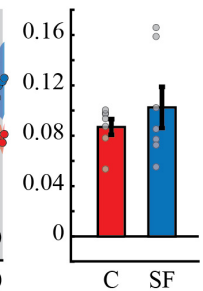

Figure 6.
